# Supplementary material
Source: PubMed Central journal article supplement (PMC6170694)
Supplement: NIHMS1503908-supplement-3.pdf [file NIHMS1503908-supplement-3.pdf]

**Supplementary Table S1.** The set of 45 breast CTC-specific transcripts identified after database and RNAseq search as potential markers for breast CTCs.

|         |        |        |       |          |         |
|---------|--------|--------|-------|----------|---------|
| AGR2    | CXCL13 | FAT2   | MMP11 | PRAME    | TFAP2C  |
| AGR3    | CXCL14 | FOXA1  | MUC16 | S100A2   | TFF12   |
| CADPS2  | CYP1A1 | GFRA   | MUCL1 | SCGB2A1  | TMPRSS4 |
| CDH11   | EFHD1  | IRX5   | OCLN  | SERPINA3 | WFDC1   |
| CDH3    | ERBB2  | MAGED1 | PGR   | SFRP1    | WFDC2   |
| COL11A1 | ERBB3  | MAGED2 | PIP   | SFRP2    |         |
| COL8A1  | ESR1   | MCRA5  | PKP3  | SPP1     |         |
| CRABP2  | FAT1   | MGP    | POSTN | TFAP2B   |         |

**Supplementary Table S2.** Association of clinical characteristics between patients with high versus low CTC-Scores, both at baseline and at 3-4 weeks on-treatment time points.

| Categorical variables            |              |      |           |      |       |        |                        |                        |      |                       |      |       |        |                         |
|----------------------------------|--------------|------|-----------|------|-------|--------|------------------------|------------------------|------|-----------------------|------|-------|--------|-------------------------|
|                                  | Pretreatment |      |           |      |       |        |                        | 3-4 weeks on treatment |      |                       |      |       |        |                         |
|                                  | All          |      | CTC Score |      |       |        | Fisher's exact p-value | All                    |      | CTC Score (3-4 weeks) |      |       |        | Fisher's exact p-values |
|                                  | N            | %    | <= 3000   |      | >3000 |        |                        | N                      | %    | <= 3000               |      | >3000 |        |                         |
|                                  |              |      | N         | %    | N     | %      |                        |                        | N    | %                     | N    | %     |        |                         |
| <b>Chemotherapy</b>              |              |      |           |      |       |        |                        |                        |      |                       |      |       |        |                         |
| No                               | 79           | 89.8 | 46        | 92   | 33    | 86.8   | n.s.                   | 57                     | 91.9 | 34                    | 94.4 | 23    | 88.5   | n.s.                    |
| Yes                              | 9            | 10.2 | 4         | 8    | 5     | 13.2   |                        | 5                      | 8.1  | 2                     | 5.6  | 3     | 11.5   |                         |
| <b>Anti-HER2</b>                 |              |      |           |      |       |        |                        |                        |      |                       |      |       |        |                         |
| No                               | 77           | 87.5 | 43        | 86   | 34    | 89.5   | n.s.                   | 55                     | 88.7 | 33                    | 91.7 | 22    | 84.6   | n.s.                    |
| Yes                              | 11           | 12.5 | 7         | 14   | 4     | 10.5   |                        | 7                      | 11.3 | 3                     | 8.3  | 4     | 15.4   |                         |
| <b>Endocrine</b>                 |              |      |           |      |       |        |                        |                        |      |                       |      |       |        |                         |
| No                               | 50           | 56.8 | 25        | 50   | 25    | 65.8   | n.s.                   | 35                     | 56.5 | 19                    | 52.8 | 16    | 61.5   | n.s.                    |
| Yes                              | 38           | 43.2 | 25        | 50   | 13    | 34.2   |                        | 27                     | 43.5 | 17                    | 47.2 | 10    | 38.5   |                         |
| <b>CDK4/6</b>                    |              |      |           |      |       |        |                        |                        |      |                       |      |       |        |                         |
| No                               | 61           | 69.3 | 33        | 66   | 28    | 73.7   | n.s.                   | 40                     | 64.5 | 23                    | 63.9 | 17    | 65.4   | n.s.                    |
| Yes                              | 27           | 30.7 | 17        | 34   | 10    | 26.3   |                        | 22                     | 35.5 | 13                    | 36.1 | 9     | 34.6   |                         |
| <b>Status at Diagnosis</b>       |              |      |           |      |       |        |                        |                        |      |                       |      |       |        |                         |
| ER                               | 60           | 68.2 | 36        | 72   | 24    | 63.2   | n.s.                   | 43                     | 69.4 | 28                    | 77.8 | 15    | 57.7   | n.s.                    |
| HER2                             | 9            | 10.2 | 7         | 14   | 2     | 5.3    |                        | 6                      | 9.7  | 4                     | 11.1 | 2     | 7.7    |                         |
| TNBC                             | 17           | 19.3 | 6         | 12   | 11    | 28.9   |                        | 12                     | 19.4 | 4                     | 11.1 | 8     | 30.8   |                         |
| Missing                          | 2            | 2.3  | 1         | 2    | 1     | 2.6    |                        | 1                      | 1.6  | -                     | -    | 1     | 3.8    |                         |
| <b>Type Diagnosis</b>            |              |      |           |      |       |        |                        |                        |      |                       |      |       |        |                         |
| Ductal                           | 70           | 79.5 | 41        | 82   | 29    | 76.3   | n.s.                   | 49                     | 79   | 29                    | 80.6 | 20    | 76.9   | n.s.                    |
| Lobular                          | 7            | 8    | 1         | 2    | 6     | 15.8   |                        | 5                      | 8.1  | 1                     | 2.8  | 4     | 15.4   |                         |
| Mixed                            | 5            | 5.7  | 4         | 8    | 1     | 2.6    |                        | 5                      | 8.1  | 4                     | 11.1 | 1     | 3.8    |                         |
| Unknown                          | 6            | 6.8  | 4         | 8    | 2     | 5.2    |                        | 3                      | 4.8  | 2                     | 5.6  | 1     | 3.8    |                         |
| <b>Mets visceral</b>             |              |      |           |      |       |        |                        |                        |      |                       |      |       |        |                         |
| N                                | 26           | 29.5 | 17        | 34   | 9     | 23.7   | n.s.                   | 18                     | 29   | 9                     | 25   | 9     | 34.6   | n.s.                    |
| Y                                | 62           | 70.5 | 33        | 66   | 29    | 76.3   |                        | 44                     | 71   | 27                    | 75   | 17    | 65.4   |                         |
| <b>Mets bone</b>                 |              |      |           |      |       |        |                        |                        |      |                       |      |       |        |                         |
| N                                | 31           | 35.2 | 15        | 30   | 16    | 42.1   | n.s.                   | 22                     | 35.5 | 13                    | 36.1 | 9     | 34.6   | n.s.                    |
| Y                                | 57           | 64.8 | 35        | 70   | 22    | 57.9   |                        | 40                     | 64.5 | 23                    | 63.9 | 17    | 65.4   |                         |
| <b>Mets brain</b>                |              |      |           |      |       |        |                        |                        |      |                       |      |       |        |                         |
| N                                | 84           | 95.5 | 49        | 98   | 35    | 92.1   | n.s.                   | 59                     | 95.2 | 35                    | 97.2 | 24    | 92.3   | n.s.                    |
| Y                                | 4            | 4.5  | 1         | 2    | 3     | 7.9    |                        | 3                      | 4.8  | 1                     | 2.8  | 2     | 7.7    |                         |
| <b>CA 15-3</b>                   |              |      |           |      |       |        |                        |                        |      |                       |      |       |        |                         |
| Abnormal ( $\geq 30$ )           | 52           | 59.1 | 27        | 54   | 25    | 65.8   | n.s.                   | 36                     | 58.1 | 23                    | 63.9 | 13    | 50     | n.s.                    |
| Missing                          | 15           | 17   | 9         | 18   | 6     | 15.8   |                        | 12                     | 19.4 | 7                     | 19.4 | 5     | 19.2   |                         |
| Normal ( $< 30$ )                | 21           | 23.9 | 14        | 28   | 7     | 18.4   |                        | 14                     | 22.6 | 6                     | 16.7 | 8     | 30.8   |                         |
| <b>Continuous variables</b>      |              |      |           |      |       |        |                        |                        |      |                       |      |       |        |                         |
|                                  |              | N    | Mean      | S.D. | 25th  | Median | 75th                   |                        | N    | Mean                  | S.D. | 25th  | Median | 75th                    |
| Age                              | All          | 87   | 59.9      | 10.7 | 54    | 60     | 68                     | All                    | 61   | 59.5                  | 10.5 | 52    | 60     | 68                      |
|                                  | CTC Score    |      |           |      |       |        |                        | CTC Score              |      |                       |      |       |        |                         |
|                                  | <= 3000      | 50   | 58.8      | 11.1 | 54    | 59     | 68                     | <= 3000                | 35   | 58.6                  | 12.1 | 49    | 59     | 70                      |
| >3000                            | 37           | 61.2 | 10.1      | 56   | 62    | 68     | >3000                  | 26                     | 60.6 | 8                     | 54   | 60    | 67     |                         |
| Number prior endocrine therapies | All          | 85   | 1.1       | 1.2  | 0     | 1      | 2                      | All                    | 61   | 1                     | 1.1  | 0     | 1      | 2                       |
|                                  | CTC Score    |      |           |      |       |        |                        | CTC Score              |      |                       |      |       |        |                         |
|                                  | <= 3000      | 47   | 1.1       | 1.1  | 0     | 1      | 2                      | <= 3000                | 35   | 1.2                   | 1.2  | 0     | 1      | 2                       |
| >3000                            | 38           | 1.1  | 1.3       | 0    | 1     | 2      | >3000                  | 26                     | 0.8  | 0.9                   | 0    | 1     | 1      |                         |
| Number prior therapies           | All          | 85   | 2.4       | 2    | 1     | 2      | 4                      | All                    | 61   | 2.4                   | 1.8  | 1     | 2      | 4                       |
|                                  | CTC Score    |      |           |      |       |        |                        | CTC Score              |      |                       |      |       |        |                         |
|                                  | <= 3000      | 47   | 1.9       | 1.7  | 0     | 2      | 3                      | <= 3000                | 35   | 2.3                   | 1.7  | 1     | 2      | 3                       |
| >3000                            | 38           | 2.9  | 2.3       | 1    | 2.5   | 4      | >3000                  | 26                     | 2.5  | 1.9                   | 1    | 2     | 4      |                         |

**Supplementary Table S3.** Significant baseline predictors of overall survival in multivariate Cox proportional hazards model.

| <b>Variable</b>       | <b>Comparison</b> | <b>Hazard ratio</b> | <b>95% CI</b> | <b>Wald p-value</b> |
|-----------------------|-------------------|---------------------|---------------|---------------------|
| CTC score at baseline | ≤ 3000 vs. > 3000 | 0.37                | 0.06 to 0.87  | 0.02                |
| CDK 4/6               | No vs. Yes        | 4.38                | 1.35 to 14.2  | 0.01                |
| ESR1 mutation         | No vs. Yes        | 0.32                | 0.11 to 0.94  | 0.04                |

**Supplementary Table S4.** Therapies administered to HR+ TRACK patients initiating a new line of endocrine treatment at enrollment.

| <b>Therapy</b>           | <b>Number of patients</b> |
|--------------------------|---------------------------|
| AI                       | 1                         |
| AI + CDK4/6              | 17                        |
| AI + other combination   | 2                         |
| SERD                     | 5                         |
| SERD + CDK4/6            | 7                         |
| SERD + other combination | 2                         |
| Other                    | 2                         |

**Supplementary Table S5.** ESR1 mutations detected by tissue biopsy-based genotyping (SNaPShot assay) and RNA-based CTC-ddPCR analysis in women with HR+ breast cancer (receiving endocrine treatment) and in TNBC patients (negative control).

| Sample ID                                       | Genotyping site | ESR1 mutation by genotyping | ESR1 mutation by CTC-ddPCR |
|-------------------------------------------------|-----------------|-----------------------------|----------------------------|
| <b>HR+ patients receiving endocrine therapy</b> |                 |                             |                            |
| TRACK03                                         | Metastatic      | none                        | none                       |
| TRACK04                                         | Primary         | NA                          | none                       |
| TRACK05                                         | Primary         | none                        | none                       |
| TRACK06                                         | NA              | NA                          | none                       |
| TRACK12                                         | Primary         | none                        | none                       |
| TRACK15                                         | Metastatic      | <b>L536Q*</b>               | none                       |
| TRACK16                                         | NA              | NA                          | none                       |
| TRACK19                                         | NA              | NA                          | none                       |
| TRACK22                                         | Metastatic      | none                        | <b>Y537N, D538G</b>        |
| TRACK23                                         | NA              | NA                          | none                       |
| TRACK24                                         | Primary         | none                        | none                       |
| TRACK26                                         | Primary         | none                        | none                       |
| TRACK33                                         | Metastatic      | none                        | none                       |
| TRACK35                                         | Primary         | none                        | <b>D538G</b>               |
| TRACK39                                         | NA              | NA                          | none                       |
| TRACK42                                         | NA              | NA                          | none                       |
| TRACK46                                         | Metastatic      | none                        | none                       |
| TRACK47                                         | NA              | NA                          | none                       |
| TRACK49                                         | Metastatic      | none                        | none                       |
| TRACK51                                         | NA              | NA                          | none                       |
| TRACK52                                         | Primary         | none                        | <b>Y537C</b>               |
| TRACK64                                         | Metastatic      | none                        | none                       |
| TRACK65                                         | Metastatic      | none                        | none                       |
| TRACK66                                         | NA              | NA                          | none                       |
| TRACK68                                         | NA              | NA                          | none                       |
| TRACK70                                         | Metastatic      | none                        | none                       |
| TRACK71                                         | Primary         | none                        | none                       |
| TRACK73                                         | Metastatic      | none                        | none                       |
| TRACK75                                         | Primary         | none                        | none                       |
| TRACK76                                         | Primary         | none                        | <b>D538G</b>               |
| TRACK84                                         | Metastatic      | none                        | none                       |
| TRACK85                                         | NA              | NA                          | none                       |
| TRACK86                                         | Primary         | none                        | none                       |
| TRACK91                                         | Primary         | none                        | none                       |
| TRACK95                                         | Metastatic      | <b>D538G</b>                | none                       |
| TRACK101                                        | Metastatic      | none                        | <b>D538G</b>               |
| <b>TNBC patients</b>                            |                 |                             |                            |
| TRACK01                                         | Metastatic      | none                        | none                       |
| TRACK07                                         | NA              | NA                          | none                       |
| TRACK09                                         | Metastatic      | none                        | none                       |
| TRACK17                                         | Metastatic      | none                        | none                       |
| TRACK20                                         | Primary         | none                        | none                       |
| TRACK25                                         | Metastatic      | none                        | none                       |
| TRACK32                                         | Metastatic      | none                        | none                       |
| TRACK36                                         | Metastatic      | NA                          | none                       |
| TRACK38                                         | Metastatic      | NA                          | none                       |
| TRACK41                                         | Primary         | none                        | none                       |
| TRACK45                                         | Metastatic      | none                        | none                       |
| TRACK50                                         | Metastatic      | none                        | none                       |

\* Mutation not part of CTC-ddPCR ESR1 mutation panel

**Supplementary Table S6.** Patients with both ESR1 mutation and high RS score show faster progression on therapy compared with patients with low RS score or ESR1 mutation alone. Time to progression in HR+ patients with high/low RS score and with/without ESR1 mutations receiving endocrine therapy is shown. Number of patients in each category as well as median TTP are provided.

| <b>RS Score</b>                                          | <b>high</b> | <b>high</b> | <b>low</b> | <b>low</b>       |
|----------------------------------------------------------|-------------|-------------|------------|------------------|
| <b>ESR1 status</b>                                       | <b>mut</b>  | <b>WT</b>   | <b>mut</b> | <b>WT</b>        |
| <b>Number (total)</b>                                    | 3           | 10          | 2          | 10               |
| <b># progressing patients during study (percent)</b>     | 3 (100%)    | 7 (70%)     | 1 (50%)    | 4 (40%)          |
| <b>Median TTP (days) of progressing patients (range)</b> | 56 (24-217) | 58 (28-112) | 139 (NA)   | 251.5 (42 - 291) |

**Supplementary Table S7.** Taqman probes used in the breast ddPCR assay.

| <b>Gene</b>     | <b>IDT Assay ID</b> | <b>Fluorophore</b> |
|-----------------|---------------------|--------------------|
| <b>AGR2</b>     | Hs.PT.58.38683802   | HEX                |
| <b>AGR2</b>     | HS.PT.58.20615543   | FAM                |
| <b>CXCL13</b>   | Hs.PT.58.45801487   | FAM                |
| <b>CXCL14</b>   | Hs.PT.58.19273291   | FAM                |
| <b>EFHD1</b>    | Hs.PT..58.27534728  | FAM                |
| <b>FAT1</b>     | Hs.PT.58.45775110   | HEX                |
| <b>FAT1</b>     | HS.PT.58.14859907   | FAM                |
| <b>FAT2</b>     | Hs.PT.58.24846942   | HEX                |
| <b>FAT2</b>     | HS.PT.58.3832648    | FAM                |
| <b>MGP</b>      | HS.PT.58.635768     | FAM                |
| <b>MUC16</b>    | Hs.PT.58.3543722    | FAM                |
| <b>PGR</b>      | Hs.PT.58.1566542    | HEX                |
| <b>PGR</b>      | Hs.Pt.58.50458902   | FAM                |
| <b>PIP</b>      | Hs.PT.58.19165954   | FAM                |
| <b>PIP</b>      | Hs.PT.58.39868280   | HEX                |
| <b>PRAME</b>    | Hs.PT.58.45281469   | HEX                |
| <b>SCGB2A1</b>  | Hs.PT.58.864035     | HEX                |
| <b>SCGB2A1</b>  | HS.PT.58.25526882   | FAM                |
| <b>SERPINA3</b> | Hs.PT.58.15580605   | FAM                |
| <b>SFRP1</b>    | Hs.PT.58.38429156   | FAM                |
| <b>SFRP2</b>    | Hs.PT.58.20705989   | FAM                |
| <b>TMPRSS4</b>  | Hs.PT.58.3161735    | FAM                |
| <b>WFDC2</b>    | Hs.PT.58.25117187   | FAM                |
